# Supplementary material for: Non-Alcoholic Fatty Liver Disease and Risk of Incident Type 2 Diabetes: Role of Circulating Branched-Chain Amino Acids
Source: PubMed Central journal article supplement (PMC6471562; doi:10.3390/nu11030705), 2019-03-26
Supplement: nutrients-11-00705-s001.pdf [file nutrients-11-00705-s001.pdf]

**Table S1.** Multivariable linear regression analysis demonstrating the positive association of plasma branched-chain amino acids with an elevated hepatic steatosis index (HSI) (>36) after adjustment for clinical and laboratory covariates in 5791 subjects.

|                                    | Model 1 |          | Model 2 |          | Model 3 |          | Model 4 |          | Model 5 |          |
|------------------------------------|---------|----------|---------|----------|---------|----------|---------|----------|---------|----------|
|                                    | $\beta$ | <i>p</i> | $\beta$ | <i>p</i> | $\beta$ | <i>p</i> | $\beta$ | <i>p</i> | $\beta$ | <i>p</i> |
| Age                                | 0.050   | <0.001   | 0.049   | <0.001   | 0.047   | <0.001   | -0.019  | 0.217    | -0.041  | 0.007    |
| Sex (men vs. women)                | 0.503   | <0.001   | 0.505   | <0.001   | 0.502   | <0.001   | 0.505   | <0.001   | 0.474   | <0.001   |
| HSI >36 vs. ≤36                    | 0.244   | <0.001   | 0.242   | <0.001   | 0.240   | <0.001   | 0.231   | <0.001   | 0.116   | <0.001   |
| Family history of T2D (yes/no)     |         |          | 0.044   | <0.001   | 0.046   | <0.001   | 0.045   | <0.001   | 0.030   | 0.005    |
| Alcohol intake (≥10 g/day)         |         |          |         |          | 0.018   | 0.107    | 0.021   | 0.060    | 0.022   | 0.046    |
| Current smoking (yes/no)           |         |          |         |          | -0.026  | 0.019    | -0.029  | 0.011    | -0.019  | 0.076    |
| eGFR (ml/min/1.73 m <sup>2</sup> ) |         |          |         |          |         |          | -0.078  | <0.001   | -0.057  | <0.001   |
| UAE (mg/24 hr)                     |         |          |         |          |         |          | -0.007  | 0.557    | -0.016  | 0.143    |
| Use of antihypertensive medication |         |          |         |          |         |          | 0.029   | 0.021    | 0.000   | 0.994    |
| Use of lipid-lowering drugs        |         |          |         |          |         |          | 0.032   | 0.007    | 0.012   | 0.278    |
| HOMA-IR                            |         |          |         |          |         |          |         |          | 0.318   | <0.001   |
| HOMA-β                             |         |          |         |          |         |          |         |          | -0.045  | 0.083    |

$\beta$ : standardized regression coefficients. HOMA-IR and HOMA- $\beta$  were log<sub>e</sub> transformed for analyses. BMI, body mass index; eGFR, estimated glomerular filtration rate; HOMA, Homeostasis Model Assessment; HSI, hepatic steatosis index; IR, insulin resistance; T2D, type 2 diabetes; UAE; urinary albumin excretion.

**Model 1:** adjusted for age and sex.

**Model 2:** adjusted for age, sex and family history of type 2 diabetes.

**Model 3:** adjusted for age, sex, family history of type 2 diabetes, alcohol intake and current smoking.

**Model 4:** adjusted for age, sex, family history of type 2 diabetes, alcohol intake, current smoking, estimated glomerular filtration rate, urinary albumin excretion and use of antihypertensive medication and lipid-lowering drugs.

**Model 5:** adjusted for age, sex, family history of type 2 diabetes, alcohol intake, current smoking, estimated glomerular filtration rate, urinary albumin excretion, use of antihypertensive medication and lipid-lowering drugs, HOMA-IR and HOMA- $\beta$ .

**Table S2.** Prospective associations of HSI with incident type 2 diabetes.

|                     | Non-Elevated HSI | Elevated HSI     |                 |
|---------------------|------------------|------------------|-----------------|
|                     | ≤36              | >36              |                 |
| Participants, n     | 4328             | 1463             |                 |
| Incident T2D, n (%) | 128 (3.0)        | 148 (10.1)       |                 |
|                     | HR (95% CI)      |                  | <i>p</i> -Value |
| Crude Model         | (ref)            | 3.69 (2.91–4.68) | <0.001          |
| Model 1             | (ref)            | 3.57 (2.81–4.52) | <0.001          |
| Model 2             | (ref)            | 3.47 (2.73–4.40) | <0.001          |
| Model 3             | (ref)            | 3.53 (2.78–4.48) | <0.001          |
| Model 4             | (ref)            | 3.08 (2.36–4.00) | <0.001          |
| Model 5             | (ref)            | 2.20 (1.62–2.99) | <0.001          |
| Model 6             | (ref)            | 1.99 (1.45–2.17) | <0.001          |

Data are presented as hazard ratio (HR) with 95% confidence interval (CI). HSI, hepatic steatosis index; BCAA, branched-chain amino acids; T2D, type 2 diabetes.

Model 1: adjusted for age and sex.

Model 2: adjusted for age, sex and family history of type 2 diabetes.

Model 3: adjusted for age, sex, family history of type 2 diabetes, alcohol intake and current smoking.

Model 4: adjusted for age, sex, family history of type 2 diabetes, alcohol intake, current smoking, eGFR, UAE, antihypertensive medication and lipid-lowering drugs.

Model 5: adjusted for age, sex, family history of type 2 diabetes, alcohol intake, current smoking, eGFR, UAE, antihypertensive medication, lipid-lowering drugs, HOMA-IR and HOMA-β.

Model 6: adjusted for age, sex, family history of type 2 diabetes, alcohol intake, current smoking, eGFR, UAE, antihypertensive medication, lipid-lowering drugs, HOMA-IR, HOMA-β and BCAAs.

**Table S3.** Prospective associations of BCAAs with incident type 2 diabetes.

|                     | <b>BCAA<br/>per 1 SD increment</b> |                |
|---------------------|------------------------------------|----------------|
| Participants, n     | 5791                               |                |
| Incident T2D, n (%) | 276 (4.8)                          |                |
|                     | <b>HR (95%CI)</b>                  | <b>p-Value</b> |
| Crude Model         | 1.68 (1.57–1.81)                   | <0.001         |
| Model 1             | 1.65 (1.52–1.79)                   | <0.001         |
| Model 2             | 1.63 (1.50–1.77)                   | <0.001         |
| Model 3             | 1.64 (1.50–1.79)                   | <0.001         |
| Model 4             | 1.64 (1.49–1.81)                   | <0.001         |
| Model 5             | 1.35 (1.20–1.53)                   | <0.001         |
| Model 6             | 1.29 (1.13–1.48)                   | <0.001         |

Data are presented as hazard ratio (HR) with 95% confidence interval (CI). HSI, hepatic steatosis index; BCAA, branched-chain amino acids; T2D, type 2 diabetes.

Model 1: adjusted for age and sex.

Model 2: adjusted for age, sex and family history of type 2 diabetes.

Model 3: adjusted for age, sex, family history of type 2 diabetes, alcohol intake and current smoking.

Model 4: adjusted for age, sex, family history of type 2 diabetes, alcohol intake, current smoking, eGFR, UAE, antihypertensive medication and lipid lowering drugs.

Model 5: adjusted for age, sex, family history of type 2 diabetes, alcohol intake, current smoking, eGFR, UAE, antihypertensive medication, lipid-lowering drugs, HOMA-IR and HOMA- $\beta$ .

Model 6: adjusted for age, sex, family history of type 2 diabetes, alcohol intake, current smoking, eGFR, UAE, antihypertensive medication, lipid-lowering drugs, HOMA-IR, HOMA- $\beta$  and elevated HSI (yes/no).
